# Supplementary material for: Marine regime shifts in ocean biogeochemical models: a case study in theGulf of Alaska
Source: Copernicus journal article supplement (doi:10.5194/bg-13-4533-2016), 2016-08-12
Supplement: Supplementary file [file bg-13-4533-2016-supplement-title-page.pdf › bg-13-4533-2016-supplement-title-page.pdf]

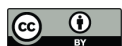

## *Supplement of*

# **Marine regime shifts in ocean biogeochemical models: a case study in the Gulf of Alaska**

**Claudie Beaulieu et al.**

*Correspondence to:* C. Beaulieu ([c.beaulieu@soton.ac.uk](mailto:c.beaulieu@soton.ac.uk))

- [bg-13-4533-2016-supplement-title-page.pdf](#)
- [DiatHadOCC\\_GoA.txt](#)
- [ERSEM\\_GoA.txt](#)
- [HadOCC\\_GoA.txt](#)
- [MEDUSA\\_GoA.txt](#)
- [PlankTOM10\\_GoA.txt](#)

The copyright of individual parts of the supplement might differ from the CC-BY 3.0 licence.
